# Supplementary material for: Microbial decomposition processes and vulnerable Arctic soil organic carbon in the 21st century
Source: Copernicus journal article supplement (doi:10.5194/bg-2018-241), 2018-06-13
Supplement: Supplementary file [file bg-2018-241-AC2-supplement.pdf]

1 Microbial decomposition processes and vulnerable Arctic soil organic carbon in the 21<sup>st</sup> century

3  
4 Junrong Zha and Qianlai Zhuang

5  
6 Department of Earth, Atmospheric, and Planetary Sciences and Department of Agronomy,  
7 Purdue University, West Lafayette, IN 47907 USA

8  
9 Submitted to: *Biogeoscience*

10 Correspondence to: [gzhuang@purdue.edu](mailto:gzhuang@purdue.edu)

## Abstract

Inadequate representation of biogeochemical processes in current biogeochemistry models contributes to a large uncertainty in carbon budget quantification. Here, detailed microbial mechanisms were incorporated into a process-based biogeochemistry model, the Terrestrial Ecosystem Model (TEM). Ensemble regional simulations with the new model (MIC-TEM) estimated the carbon budget of the Arctic ecosystems is  $76.0 \pm 114.8$  Pg C during the 20<sup>th</sup> century,  $-3.1 \pm 61.7$  Pg C under the RCP 2.6 scenario and  $94.7 \pm 46$  Pg C under the RCP 8.5 scenario during the 21<sup>st</sup> century. Positive values indicate the regional carbon sink while negative values are source to the atmosphere. Compared to the estimates using a simpler soil decomposition algorithm in TEM, the new model estimated that the Arctic terrestrial ecosystems stored 12 Pg less carbon over the 20<sup>th</sup> century, 19 Pg C and 30 Pg C less under the RCP 8.5 and RCP 2.6 scenarios, respectively, during the 21<sup>st</sup> century. When soil carbon within depths 30 cm, 100 cm and 300 cm was considered as initial carbon in the 21<sup>st</sup> century simulations, the region was estimated to accumulate 65.4, 88.6, and 109.8 Pg C, respectively, under the RCP 8.5 scenario. In contrast, under the RCP 2.6 scenario, the region lost 0.7, 2.2, and 3 Pg C, respectively, to the atmosphere. We conclude that the future regional carbon budget evaluation largely depends on whether or not the adequate microbial activities are represented in earth system models and the sizes of soil carbon considered in model simulations.

## 1. Introduction

Northern high-latitude soils and permafrost contain more than 1,600 Pg carbon (Tarnocai et al., 2009). Climate over this region has warmed in recent decades (Serreze and Francis, 2006) and the increase is 1.5 to 4.5 times the global mean (Holland and Bitz, 2003). Warming-induced changes in carbon cycling are expected to exert large feedbacks to the global climate system (Davidson and Janssens, 2006; Christensen and Christensen, 2007; Oechel et al., 2000).

Warming is expected to accelerate soil C loss by increasing soil respiration, but increasing nutrient mineralization, thereby stimulating plant net primary production (NPP) (Mack et al., 2004). Thus, the variation of climate may switch the role of the Arctic system between a C sink and a source if soil C loss overtakes NPP (Davidson et al., 2000; Jobbágy and Jackson, 2000). Process-based biogeochemical models such as TEM (Hayes et al., 2014; Raich and Schlesinger, 1992; McGuire et al., 1992; Zhuang et al., 2001, 2002, 2003, 2010, 2013), Biome-BGC (Running and Coughlan, 1988), CASA (Potter et al., 1993), CENTURY (Parton et al., 1994) and Biosphere Energy Transfer Hydrology scheme (BETHY) (Knorr et al., 2000) have been widely used to quantify the response of carbon dynamics to climatic changes (Todd-Brown et al., 2012). An ensemble of process-based model simulations suggests that arctic ecosystems acted as a sink of atmospheric CO<sub>2</sub> in recent decades (McGuire et al., 2012; Schimel et al., 2013). However, the response of this sink to increasing levels of atmospheric CO<sub>2</sub> and climate change is still uncertain (Todd-Brown et al., 2013). The IPCC 5<sup>th</sup> report also shows that land carbon storage is the largest source of uncertainty in the global carbon budget quantification (Ciais et al., 2013).

Much of the uncertainty is also due to the inadequate representation of ecosystem processes that determine the exchanges of water, energy and C between land ecosystems and the atmosphere (Wieder et al., 2013), and ignorance of some key biogeochemical mechanisms (Schmidt et al., 2011). For example, heterotrophic respiration ( $R_H$ ) is the primary loss pathway for soil organic carbon (Hanson et al., 2000; Bond-Lamberty and Thomson, 2010), and it generally increases with increasing temperature (Davidson and Janssens, 2006) and moisture levels in well-drained soils (Cook and Orchard, 2008). Moreover, this process is closely related to soil nitrogen mineralization that determines soil N availability and affects gross primary production (Hao et al., 2015). To date, most models treated soil decomposition as a first-order decay process, i.e.,  $CO_2$  respiration is directly proportional to soil organic carbon. However, it is not clear if these models are robust under changing environmental conditions (Lawrence et al., 2011; Schimel and Weintraub, 2003; Barichivich et al., 2013) since they often ignored the effects of changes in biomass and composition of decomposers, while recent empirical studies have shown that microbial abundance and community play a significant role in soil carbon decomposition (Allison and Martiny, 2008). The control that microbial activity and enzymatic kinetics imposed on soil respiration suggests the need for explicit representation of microbial physiology, enzymatic activity, in addition to the direct effects of soil temperature and soil moisture on heterotrophic respiration (Schimel and Weintraub, 2003). Recent mechanistically-based models explicitly incorporated with the microbial dynamics and enzyme kinetics that catalyze soil C decomposition have produced notably different results and a closer match to contemporary observations (Wieder et al., 2013; Allison et al., 2010) indicating the need for

incorporating these microbial mechanisms into large-scale earth system models to quantify carbon dynamics under future climatic conditions ((Wieder et al., 2013; Allison et al., 2010).

This study advanced a microbe-based biogeochemistry model (MIC-TEM) based on an extant Terrestrial Ecosystem Model (TEM) (Raich and Schlesinger, 1992; McGuire et al., 1992; Zhuang et al., 2001, 2002, 2003, 2010, 2013; Hao et al., 2015). In MIC-TEM, the heterotrophic respiration is not only a function of soil temperature, soil organic matter (SOM) and soil moisture, but also considers the effects of dynamics of microbial biomass and enzyme kinetics (Allison et al., 2010). The verified MIC-TEM was used to quantify the regional carbon dynamics in northern high latitudes (north 45 °N) during the 20<sup>th</sup> and 21<sup>st</sup> centuries.

## **2. Methods**

### **2.1 Overview**

Below we first briefly describe how we advanced the MIC-TEM by modifying the soil respiration process in TEM (Zhuang et al., 2003) to better represent carbon dynamics in terrestrial ecosystems. Second, we describe how we parameterized and verified the new model using observed net ecosystem exchange data at representative sites and how simulated net primary productivity (NPP) was evaluated with Moderate Resolution Imaging Spectroradiometer (MODIS) data to demonstrate the reliability of new model at regional scales. Third, we present how we applied the model to the northern high latitudes for the 20<sup>th</sup> and 21<sup>st</sup> centuries. Finally, we introduce how we conducted the sensitivity analysis on initial soil carbon input, using gridded observation-based soil carbon data of three soil depths during the 21<sup>st</sup> century.

## 2.2 Model description

TEM is a highly aggregated large-scale biogeochemical model that estimates the dynamics of carbon and nitrogen fluxes and pool sizes of plants and soils using spatially referenced information on climate, elevation, soils and vegetation (Raich and Schlesinger, 1992; McGuire et al., 1992; Zhuang et al., 2003, 2010; Melillo et al., 1993). To explicitly consider the effects of microbial dynamics and enzyme kinetics on large-scale carbon dynamics of northern terrestrial ecosystems, we developed MIC-TEM by coupling version 5.0 of TEM (Zhuang et al., 2003, 2010) with a microbial-enzyme module (Hao et al., 2015; Allison et al., 2010). Our modification of the TEM improved the representation of the heterotrophic respiration ( $R_H$ ) from a first-order structure to a more detailed structure (Fig. S1).

In TEM, heterotrophic respiration  $R_H$  is calculated as a function of soil organic carbon (SOC), soil temperature ( $Q_{10}$ ), soil moisture ( $f(\text{MOIST})$ ), and the gram-specific decomposition constant  $K_d$ :

$$R_H = K_d * \text{SOC} * Q_{10}^{\frac{DT}{10}} * f(\text{MOIST}) \quad (1)$$

where  $DT$  is soil temperature at top 20 cm.  $\text{CO}_2$  production from SOC pool is directly proportional to the pool size, and the activity of decomposers only depends on the built-in relationships with soil temperature and moisture (Todd-Brown et al., 2012). Therefore, the changes in microbial community composition or adaption of microbial physiology to new conditions were not represented in TEM. However, current studies indicate that soil C decomposition depends on the activity of biological communities dominated by microbes (Schimel and Weintraub, 2003), implying that the biomass and composition of the decomposer community can't be ignored (Todd-Brown et al., 2012).

We thus revised the first-order soil C structure in TEM to a second-order structure considering microbial dynamics and enzyme kinetics according to Allison et al. (2010). In MIC-TEM, heterotrophic respiration ( $R_H$ ) is calculated as:

$$R_H = \text{ASSIM} * (1 - \text{CUE}) \quad (2)$$

Where ASSIM and CUE represent microbial assimilation and carbon use efficiency, respectively. ASSIM is modeled with a Michaelis-Menten function:

$$\text{ASSIM} = V_{\text{max\_uptake}} * \text{MIC} * \frac{\text{DOC}}{K_{\text{m\_uptake}} + \text{DOC}} \quad (3)$$

Where DOC is dissolved organic carbon and  $V_{\text{max\_uptake}}$  is the maximum velocity of the reaction and calculated using the Arrhenius equation, and DOC is dissolved organic carbon:

$$V_{\text{max\_uptake}} = V_{\text{max\_uptake}_0} * e^{\frac{E_{\text{a\_uptake}}}{R * (\text{temp} + 273)}} \quad (4)$$

$V_{\text{max\_uptake}_0}$  is the pre-exponential coefficient,  $E_{\text{a\_uptake}}$  is the activation energy for the reaction ( $\text{Jmol}^{-1}$ ),  $R$  is the gas constant ( $8.314 \text{ Jmol}^{-1} \text{K}^{-1}$ ), and temp is the temperature in Celsius under the reaction occurs.

Besides,  $K_{\text{m\_uptake}}$  value is calculated as a linear function of temperature:

$$K_{\text{m\_uptake}} = K_{\text{m\_uptake\_slope}} * \text{temp} + K_{\text{m\_uptake}_0} \quad (5)$$

Microbial biomass MIC is modeled as:

$$\frac{d\text{MIC}}{dt} = \text{ASSIM} * \text{CUE} - \text{DEATH} - \text{EPROD} \quad (6)$$

Where microbial biomass death (DEATH) and enzyme production (EPROD) are modeled as constant- proportional to fraction-of microbial biomass with constant rates-  $r_{\text{death}}$  and  $r_{\text{EnzProd}}$  are rate constants:

$$154 \quad \text{DEATH} = r_{\text{death}} * \text{MIC} \quad (7)$$

$$155 \quad \text{EPROD} = r_{\text{EnzProd}} * \text{MIC} \quad (8)$$

156 Where  $r_{\text{death}}$  and  $r_{\text{EnzProd}}$  are the ratio of microbial death and enzyme production, respectively.

157 ~~Dissolved organic carbon (DOC)~~ is part of soil organic carbon:

$$158 \quad \frac{d\text{DOC}}{dt} = \text{DEATH} * (1 - \text{MICtoSOC}) + \text{DECAY} + \text{ELOSS} - \text{ASSIM} \quad (9)$$

159 where MICtoSOC is carbon input ratio as dead microbial biomass to SOC, representing the  
 160 fraction of microbial death that flows into SOC, and is set as a constant value according to  
 161 Allison et al. (2010). SOC dynamics are modeled:

$$162 \quad \frac{d\text{SOC}}{dt} = \text{Litterfall} + \text{DEATH} * \text{MICtoSOC} - \text{DECAY} \quad (10)$$

163 Where Litterfall is estimated as a function of vegetation carbon (Zhuang et al., 2010). The  
 164 enzymatic decay of SOC is calculated as:

$$165 \quad \text{DECAY} = V_{\text{max}} * \text{ENZ} * \frac{\text{SOC}}{K_m + \text{SOC}} \quad (11)$$

166 Where  $V_{\text{max}}$  is the maximum velocity of the reaction and calculated using the Arrhenius equation:

$$167 \quad V_{\text{max}} = V_{\text{max}_0} * e^{\frac{E_a}{R * (\text{temp} + 273)}} \quad (12)$$

168 The parameters  $K_m$  and carbon use efficiency (CUE) are temperature sensitive, and calculated  
 169 as a linear function of temperature between 0 and 50°C:

$$170 \quad K_m = K_{m_{\text{slope}}} * \text{temp} + K_{m_0} \quad (13)$$

$$171 \quad \text{CUE} = \text{CUE}_{\text{slope}} * \text{temp} + \text{CUE}_0 \quad (14)$$



Where  $CUE_{slope}$  and  $CUE_0$  are parameters for calculating  $CUE$ , and  $Km_{slope}$  and  $Km_0$  are parameters for calculating  $Km$ . The values of  $CUE_{slope}$ , ~~and~~  $CUE_0$ ,  $Km_{slope}$  and  $Km_0$  were derived from Allison et al. (2010).

ELOSS is also a first-order process, representing the loss of enzyme:

$$ELOSS = r_{enzloss} * ENZ \quad (15)$$

Where  $r_{enzloss}$  is the ratio of enzyme loss. Enzyme pool (ENZ) is modeled:

$$\frac{dENZ}{dt} = EPROD - ELOSS \quad (16)$$

Heterotrophic respiration ( $R_H$ ) is an indispensable component of soil respiration (Bond-Lamberty and Thomson, 2010), and closely coupled with soil nitrogen (N) mineralization that determines soil N availability, affecting gross primary production (GPP).

### 2.3 Model parameterization and validation

The variables and parameters of these microbial dynamics and their impacts on soil C decomposition were detailed in Allison et al. (2010) (Table 1). Here we parameterized MIC-TEM for representative ecosystem types in northern high latitudes based on monthly net ecosystem productivity (NEP,  $gCm^{-2} mon^{-1}$ ) measurements from AmeriFlux network (Davidson et al., 2000) (Table S1). The results for model parameterization was presented in Fig. S2.

Another set of level 4 gap-filled NEP data was used for model validation at site level (Table S2). The site-level monthly climate data of air temperature ( $^{\circ}C$ ), precipitation (mm) and cloudiness (%) were used to drive the model. Gridded MODIS NPP data from 2001 to 2010 were used to evaluate regional NPP simulation. The MODIS NPP data was developed ~~erived~~ by the MOD17

MODIS project. The product name is Net Primary Production Yearly L4 Global 1 km. The critical parameter used in MOD17 algorithm is conversion efficiency parameter  $\epsilon$ . More information about the MODIS NPP product ~~can~~ ~~could~~ be found at ~~on~~ [https://neo.sci.gsfc.nasa.gov/view.php?datasetId=MOD17A2\\_M\\_PSN](https://neo.sci.gsfc.nasa.gov/view.php?datasetId=MOD17A2_M_PSN).

In TEM, NPP is calculated as:

$$\text{NPP} = \text{GPP} - R_A \quad (17)$$

Where GPP is gross primary production, and  $R_A$  is autotrophic respiration.

$$\text{GPP} = C_{\max} * f(\text{PAR}) * f(\text{moist}) * f(\text{foliage}) * f(T) * f(\text{CO}_2) * f(\text{NA}) \quad (18)$$

For detailed GPP and  $R_A$  calculations, see Zhuang et al. (2003).

The parameterization was conducted with a global optimization algorithm SCE-UA (Shuffled complex evolution) (Duan et al., 1994) to minimize the difference between the monthly simulated and measured NEE at these sites (Fig. S2). The cost function of the minimization is:

$$\text{Obj} = \sum_{i=1}^k (\text{NEP}_{\text{obs},i} - \text{NEP}_{\text{sim},i})^2 \quad (19)$$

Where  $\text{NEP}_{\text{obs},i}$  and  $\text{NEP}_{\text{sim},i}$  are the observed and simulated NEP, respectively.  $k$  is the number of data pairs for comparison. Other parameters used in MIC-TEM were default values from TEM 5.0 (Zhuang et al., 2003, 2010). The optimized parameters were used for model validation and regional extrapolations.

## 2.4 Regional simulations

Two sets of regional simulations for the 20<sup>th</sup> century using MIC-TEM and TEM at a spatial resolution of 0.5° latitude × 0.5° longitude were conducted. Gridded forcing data of monthly air temperature, precipitation, and cloudiness were used, along with other ancillary inputs including historical atmospheric CO<sub>2</sub> concentrations, soil texture, elevation, and potential natural vegetation. Climatic inputs vary over time and space, whereas soil texture, elevation, and land cover data are assumed to remain unchanged throughout the 20<sup>th</sup> century, which only vary spatially. The transient climate data during the 20<sup>th</sup> century was organized from the Climatic Research Unit (CRU TS3.1) from the University of East Anglia (Harris et al., 2014). The spatial-explicit data include potential natural vegetation (Melillo et al., 1993), soil texture (Zhuang et al., 2003) and elevation (Zhuang et al., 2015).

Similarly, two sets of simulations were conducted driven with two contrasting climate change scenarios (RCP 2.6 and RCP 8.5) over the 21<sup>st</sup> century. The future climate change scenarios were derived from the HadGEM2-ES model, which is a member of CMIP5 project (<https://esgf-node.llnl.gov/search/cmip5/>). The future atmospheric CO<sub>2</sub> concentrations and climate forcing from each of the two climate change scenarios were used. The simulated NPP, R<sub>H</sub> and NEP by both models (TEM 5.0 and MIC-TEM) were analyzed. The positive NEP represents a CO<sub>2</sub> sink from the atmosphere to terrestrial ecosystems, while a negative value represents a source of CO<sub>2</sub> from terrestrial ecosystems to the atmosphere.

Besides, in order to test the parameter uncertainty in our model, we conducted the regional simulations with 50 sets of parameters for both historical and future studies. The 50 sets of parameters were obtained according to the method in Tang and Zhuang (2008). The upper and lower bounds of the regional estimations were generated based on these simulations.

235

## 236 **2.5 Sensitivity to initial soil carbon input**

237 Future carbon dynamics can be affected by varying initial soil carbon amount. In the standard  
238 simulation of TEM, the initial soil carbon amount for transient simulations was obtained from  
239 equilibrium and spin-up periods directly for each grid cell in the region. To test the sensitivity to  
240 the initial soil carbon amount in transient simulations for the 21<sup>st</sup> century, we used empirical soil  
241 organic carbon data extracted from the Northern Circumpolar Soil Carbon Database (NCSCD)  
242 (Tarnocai et al., 2009), as the initial soil carbon amount. The  $0.5^\circ \times 0.5^\circ$  soil carbon data  
243 products for three different depths of 30cm, 100cm and 300cm were used. The sensitivity test  
244 was conducted for transient simulations under the RCP 2.6 and RCP 8.5 scenarios. To avoid the  
245 instability of C-N ratio caused by replacing the initial soil carbon pool with observed data at the  
246 beginning of transient period, initial soil nitrogen values were also generated based on the soil  
247 carbon data and corresponding C-N ratio map for transient simulations (Zhuang et al., 2003;  
248 Raich and Schlesinger, 1992).

249

## 250 **3. Results**

### 251 **3.1 Model verification at site and regional levels**

252 With the optimized parameters, MIC-TEM reproduces the carbon dynamics well for alpine  
253 tundra, boreal forest, temperate coniferous forest, temperate deciduous forest, grasslands and wet  
254 tundra with  $R^2$  ranging from 0.70 for Ivotuk to 0.94 for Bartlett Experimental Forest (Fig. S3,  
255 table S3). In general, model performs better for forest ecosystems than for tundra ecosystems.  
256 The temporal NPP from 2001 to 2010 simulated by MIC-TEM and TEM were compared with

MODIS NPP data (Fig. S4). Pearson correlation coefficients are 0.52 (MIC-TEM and MODIS) and 0.34 (TEM and MODIS). NPP simulated by MIC-TEM showed higher spatial correlation coefficients with MODIS data than TEM (Fig. S5). By considering more detailed microbial activities, the heterotrophic respiration is more adequately simulated using the MIC-TEM. The simulated differences in soil decomposition result in different levels of soil available nitrogen, which influences the nitrogen uptake by plants, the rate of photosynthesis and NPP. The spatial correlation coefficient between NPP simulated by MIC-TEM and MODIS is close to 1 in most study areas, suggesting the reliability of MIC-TEM at the regional scale.

### **3.2 Regional carbon dynamics during the 20<sup>th</sup> century**

The equifinality of the parameters in MIC-TEM was considered in our ensemble regional simulations to measure the parameter uncertainty (Tang and Zhuang, 2008). Here and below, the ensemble means and the inter-simulation standard deviations are shown for uncertainty measure, unless specified as others. These ensemble simulations indicated that the northern high latitudes act from a carbon source of 38.9 PgC to a carbon sink of 190.8 PgC by different ensemble members, with the mean of  $64.2 \pm 21.4$  Pg at the end of 20<sup>th</sup> century while the simulation with the optimized parameters estimates a regional carbon sink of 77.6 Pg with the interannual standard deviation of  $0.21 \text{ PgC yr}^{-1}$  during the 20<sup>th</sup> century (Fig 1). Simulated regional NEP with optimized parameters using TEM and MIC-TEM showed an increasing trend throughout the 20<sup>th</sup> century except a slight decrease during the 1960s (Fig. 2). The Spatial distributions of NEP simulated by MIC-TEM for different periods in 20<sup>th</sup> century also show the increasing trend (Fig 3). Positive values of NEP represent sinks of CO<sub>2</sub> into terrestrial ecosystems, while negative

values represent sources of CO<sub>2</sub> to the atmosphere. From 1900 onwards, both models estimated a regional carbon sink during the 20<sup>th</sup> century. With optimized parameters, TEM estimated higher NPP and R<sub>H</sub> at 0.6 PgC yr<sup>-1</sup> and 0.3 PgC yr<sup>-1</sup> than MIC-TEM, respectively, at the end of the 20<sup>th</sup> century (Fig. 2). The MIC-TEM estimated a carbon sink increase from 0.64 to 0.83 PgCyr<sup>-1</sup> during the century while the estimated increase by TEM was much higher (0.28 PgCyr<sup>-1</sup>) (Fig. 2). At the end of the century, MIC-TEM estimated NEP reached 1.0 PgCyr<sup>-1</sup> in comparison with TEM estimates of 0.3 PgCyr<sup>-1</sup>. TEM estimated NPP and R<sub>H</sub> are 0.5 PgCyr<sup>-1</sup> and 0.3 PgCyr<sup>-1</sup> higher, respectively. As a result, TEM estimated that the region accumulated 11.4 Pg more carbon than MIC-TEM. Boreal forests are a major carbon sink at 0.55 and 0.63 PgCyr<sup>-1</sup> estimated by MIC-TEM and TEM, respectively. Alpine tundra contributes the least sink. Overall, TEM overestimated the sink by 12.5% in comparison to MIC-TEM for forest ecosystems and 16.7% for grasslands. For wet tundra and alpine tundra, TEM overestimated about 20% and 33% in comparison with MIC-TEM, respectively (Table 2).

### 3.3 Regional carbon dynamics during the 21<sup>st</sup> century

Regional annual NPP and R<sub>H</sub> increases under the RCP 8.5 scenario according to simulations with both models (Fig. 4). With optimized parameters, MIC-TEM estimated NPP increases from 9.2 in the 2000s to 13.2 PgCyr<sup>-1</sup> in the 2090s, while TEM predicted NPP is 2.0 PgCyr<sup>-1</sup> higher in the 2000s and 0.3 PgCyr<sup>-1</sup> higher in the 2090s (Fig. 4). Similarly, TEM also overestimated R<sub>H</sub> by 1.7 PgCyr<sup>-1</sup> in the 2000s and 0.25 PgCyr<sup>-1</sup> higher in the 2090s, respectively (Fig. 4). As a result, the regional sink increases from 0.53 PgCyr<sup>-1</sup> in the 2000s, 1.4 PgCyr<sup>-1</sup> in the 2070s, then decreases to 1.1 PgCyr<sup>-1</sup> in the 2090s estimated by MIC-TEM (Fig. 4). Given the uncertainty in parameters,

MIC-TEM predicted the region acts as a carbon sink ranging from 48.7 to 140.7 Pg, with the mean of  $71.7 \pm 26.6$  Pg at the end of 21<sup>st</sup> century, while the simulation with optimized parameters estimates a regional carbon source of 79.5 Pg with the interannual standard deviation of 0.37 PgC yr<sup>-1</sup> during the 21<sup>st</sup> century (Fig 4). TEM predicted a similar trend for NEP, which overestimated the carbon sink with magnitude of 19.2 Pg compared with the simulation by MIC-TEM with optimized parameters. Under the RCP 2.6 scenario (Fig. 4), the increase of NPP and R<sub>H</sub> is smaller from 2000 to 2100 compared to the simulation under the RCP 8.5. MIC-TEM predicted that NPP increases from 9.1 to 10.9 PgCyr<sup>-1</sup>, TEM estimated 1.6 PgCyr<sup>-1</sup> higher at the beginning and 0.9 PgCyr<sup>-1</sup> higher in the end of the 21<sup>st</sup> century (Fig. 4). Consequently, MIC-TEM predicted NEP fluctuates between sinks and sources during the century, with a neutral before 2070, and a source between -0.2 - -0.3 Pg C yr<sup>-1</sup> after the 2070s. As a result, the region acts as a carbon source of 1.6 Pg C with the interannual standard deviation of 0.24 PgC yr<sup>-1</sup> estimated with MIC-TEM and a sink of 27.6 Pg C with the interannual standard deviation of 0.2 PgC yr<sup>-1</sup> estimated with TEM during the century (Fig. 4). When considering the uncertainty source of parameters, MIC-TEM predicted the region acts from a carbon source of 64.8 Pg C to a carbon sink of 58.6 Pg C during the century with the mean of  $-3.3 \pm 20.3$  Pg at the end of 21<sup>st</sup> century (Fig 4).

### 3.4 Model sensitivity to initial soil carbon

Under the RCP 2.6, without replacing the initial soil carbon with inventory-based estimates<sup>1</sup> in model simulations, TEM estimated that the regional soil organic carbon (SOC) is 604.2 Pg C and

accumulates 12.1 Pg C during the 21<sup>st</sup> century. When using estimated soil carbon<sup>1</sup> within depths of 30cm, 100cm and 300cm as initial pools in simulations, TEM predicted that regional SOC is 429.5, 689.3 and 1003.4 Pg C in 2000, and increases by 9.9, 16.0 and 22.8 Pg C at the end of the 21<sup>st</sup> century, and the regional cumulative carbon sink is 20.4, 34.0, and 48.1 Pg C, respectively during the century. In contrast, using the same inventory-based SOC estimates, MIC-TEM projected that the region acts from a cumulative carbon sink to a source at 0.7, 2.2, and 3.0 Pg C, respectively. Under the RCP 8.5, both models predicted that the region acts as a carbon sink, regardless of the magnitudes of initial soil carbon pools used, with TEM projected sink of 71.7, 120, and 155.6 Pg C and a much smaller cumulative sink of 65.4, 88.6, and 109.8 Pg C estimated with MIC-TEM, respectively (Table 3).

#### **4. Discussion**

During the last few decades, a greening accompanying warming and rising atmospheric CO<sub>2</sub> in the northern high latitudes (>45° N) has been documented (McGuire et al., 1995; McGuire and Hobbie, 1997; Chapin and Starfield, 1997; Stow et al., 2004; Callaghan et al., 2005; Tape et al., 2006). The large stocks of carbon contained in the region (Tarnocai et al., 2009) are particularly vulnerable to climate change (Schuur et al., 2008; McGuire et al., 2009). To date, the degree to which the ecosystems may serve as a source or a sink of C in the future are still uncertain (McGuire et al., 2009; Wieder et al., 2013). Therefore, accurate models are essential for predicting carbon–climate feedbacks in the future (Todd-Brown et al., 2013). Our regional simulations indicate the region is currently a carbon sink, which is consistent with many previous studies (White et al., 2000; Houghton et al., 2007), and this sink will grow under the RCP 8.5 scenario, but shift to a carbon source under the RCP 2.6 scenario by 2100. MIC-TEM shows a



higher correlation between NPP and soil temperature ( $R=0.91$ ) than TEM ( $R=0.82$ ), suggesting that MIC-TEM is more sensitive to environmental changes (Table S4).

Our regional estimates of carbon fluxes by MIC-TEM are within the uncertainty range from other existing studies. For instance, Zhuang et al. (2003) estimated the region as a sink of  $0.9 \text{ PgCyr}^{-1}$  in extratropical ecosystems for the 1990s, which is similar to our estimation of  $0.83 \text{ PgCyr}^{-1}$  by MIC-TEM. White et al. (2000) estimated that, during the 1990s, regional NEP above  $50^\circ\text{N}$  region is  $0.46 \text{ PgCyr}^{-1}$  while Qian et al. (2010) estimated that NEP increased from 0 to  $0.3 \text{ PgCyr}^{-1}$  for the high-latitude region above  $60^\circ\text{N}$  during last century, and reached  $0.25 \text{ PgCyr}^{-1}$  during the 1990s. White et al. (2000) predicted that, from 1850 to 2100, the region accumulated  $134 \text{ PgC}$  in terrestrial ecosystems, in comparison with our estimates of  $77.6 \text{ PgC}$  with MIC-TEM and  $89 \text{ PgC}$  with TEM. Our projection of a weakening sink during the second half of the 21<sup>st</sup> century is consistent with previous model studies (Schaphoff et al., 2013). Our predicted trend of NEP is very similar to the finding of White et al. (2000), indicating that NEP increases from  $0.46 \text{ PgCyr}^{-1}$  in the 2000s and reaches  $1.5 \text{ PgCyr}^{-1}$  in the 2070s, then decreases to  $0.6 \text{ PgCyr}^{-1}$  in the 2090s.

The MIC-TEM simulated NEP generally agrees with the observations. However, model simulations still deviate from the observed data, especially for tundra ecosystems. The deviation may be due to the uncertainty or errors in the observed data, which do not well constrain the model parameters. Uncertain driving data such as temperature and precipitation are also a source of uncertainty for transient simulations. In addition, we assumed that vegetation will not change during the transient simulation. However, over the past few decades in the northern high latitudes, temperature increases have led to vegetation changes (Hansen et al., 2006), including latitudinal

treeline advance (Lloyd et al., 2005) and increasing shrub density (Sturm et al., 2001). Vegetation can shift from one type to another because of competition for light, N and water (White et al., 2000). For example, needleleaved trees tend to replace tundra gradually in response to warming. In some areas, forests even moved several hundreds of kilometers within 100 years (Gear and Huntley, 1991). The vegetation changes will affect carbon cycling in these ecosystems. In addition, we have not yet considered the effects of management of agriculture lands (Cole et al., 1997), but Zhuang et al. (2003) showed that the changes in agricultural land use in northern high latitudes have been small.

The largest limitation to this study is that we have not explicitly considered the fire effects. Warming in the northern high latitudes could favor fire in its frequency, intensity, seasonality and extent (Kasischke and Turetsky, 2006; Johnstone and Kasischke, 2005; Soja et al., 2007; Randerson et al., 2006; Bond-Lamberty et al., 2007). Fire has profound effects on northern forest ecosystems, altering the N cycle and water and energy exchanges between the atmosphere and ecosystems. Increase in wildfires will destroy most of above-ground biomass and consume organic soils, resulting in less carbon uptake by vegetation (Harden et al., 2000), leading to a net release of carbon in a short term. However, a suite of biophysical mechanisms of ecosystems including post-fire increase in the surface albedo and rates of biomass accumulation may in turn, exert a negative feedback to climate warming (Amiro et al., 2006; Goetz et al., 2007), further influence the carbon exchanges between ecosystems and the atmosphere.

Moreover, carbon uptake in land ecosystems depends on new plant growth, which connects tightly with the availability of nutrients such as mineral nitrogen. Recent studies have shown that when soil nitrogen is in short supply, most terrestrial plants would form symbiosis

relationships with fungi; hyphae provides nitrogen to plants, in return, plants provide sugar to fungi (Hobbie and Hobbie, 2008, 2006; Schimel and Hättenschwiler, 2007). This symbiosis relationship has not been considered in our current modeling, which may lead to a large uncertainty in our quantification of carbon and nitrogen dynamics.

Shift in microbial community structure was not considered in our model, which could affect the temperature sensitivity of heterotrophic respiration (Stone et al., 2012). Michaelis-Menten constant ( $K_m$ ) could also adapt to climate warming, and it may increase more significantly with increasing temperature in cold-adapted enzymes than in warm-adapted enzymes (German et al., 2012; Somero et al., 2004; Dong and Somero, 2009). Carbon use efficiency (CUE) is also a controversial parameter in our model. Empirical studies in soils suggest that microbial CUE declines by at least  $0.009\text{ }^{\circ}\text{C}^{-1}$  (Steinweg et al., 2008), while other studies find that CUE is invariant with temperature (López-Urrutia and Morán, 2007). Another key microbial trait lacking in our modeling is microbial dormancy (He et al., 2015). Dormancy is a common, bet-hedging strategy used by microorganisms when environmental conditions limit their growth and reproduction (Lennon and Jones, 2011). Microorganisms in dormancy are not able to drive biogeochemical processes such as soil  $\text{CO}_2$  production, and therefore, only active microorganisms should be involved in utilizing substrates in soils (Blagodatskaya and Kuzyakov, 2013). Many studies have indicated that soil respiration responses to environmental conditions are more closely associated with the active portion of microbial biomass than total microbial biomass (Hagerty et al., 2014; Schimel and Schaeffer, 2012; Steinweg et al., 2013). Thus, the ignorance of microbial dormancy could fail to distinguish microbes with different physiological states, introducing uncertainties to our carbon estimation.

## 5. Conclusions

This study used a more detailed microbial biogeochemistry model to investigate the carbon dynamics in the region for the past and this century. Regional simulations using MIC-TEM indicated that, over the 20<sup>th</sup> century, the region is a sink of 77.6 Pg. This sink could reach to 79.5 Pg under the RCP 8.5 scenario or shift to a carbon source of 1.6 Pg under the RCP 2.6 scenario during 21<sup>st</sup> century. On the other hand, traditional TEM overestimated the carbon sink under the RCP 8.5 scenario with magnitude of 19.2 Pg than MIC-TEM, and predicted this region acting as carbon sink with magnitude of 27.6 Pg under the RCP 2.6 scenario during 21<sup>st</sup> century. Using recent soil carbon stock data as initial soil carbon in model simulations, the region was estimated to shift from a carbon sink to a source, with total carbon release at 0.7- 3 Pg by 2100 depending on initial soil carbon pools at different soil depths under the RCP 2.6 scenario. In contrast, the region acts as a carbon sink at 55.4 - 99.8 Pg C in the 21<sup>st</sup> century under RCP 8.5 scenario. Without considering more detailed microbial processes, models estimated that the region acts as a carbon sink under both scenarios. Under the RCP 2.6 scenario, the cumulative sink ranges from 9.9 to 22.8 Pg C. Under the RCP 8.5 scenario, the cumulative sink is even larger at 71.7 - 155.6 Pg C. This study indicated that more detailed microbial physiology-based biogeochemistry models estimate carbon dynamics very differently from using a relatively simple microbial decomposition-based model. The comparison with satellite products or other estimates for the 20<sup>th</sup> century suggests that the more detailed microbial decomposition shall be considered to adequately quantify C dynamics in northern high latitudes.

## Acknowledgments

This research was supported by a NSF project (IIS-1027955), a DOE project (DE-SC0008092), and a NASA LCLUC project (NNX09AI26G) to Q. Z. We acknowledge the Rosen High Performance Computing Center at Purdue for computing support. We thank the National Snow and Ice Data center for providing Global Monthly EASE-Grid Snow Water Equivalent data, National Oceanic and Atmospheric Administration for North American Regional Reanalysis (NARR), and Hugelius and his group by making available pan-Arctic permafrost soil C maps. We also acknowledge the World Climate Research Programme's Working Group on Coupled Modeling Intercomparison Project CMIP5, and we thank the climate modeling groups for producing and making available their model output. The data presented in this paper can be accessed through our research website (<http://www.eaps.purdue.edu/ebdl/>)

## References

- Allison, S. D., and Martiny, J. B.: Colloquium paper: resistance, resilience, and redundancy in microbial communities, *Proceedings of the National Academy of Sciences of the United States of America*, 105 Suppl 1, 11512-11519, 10.1073/pnas.0801925105, 2008.
- Allison, S. D., Wallenstein, M. D., and Bradford, M. A.: Soil-carbon response to warming dependent on microbial physiology, *Nature Geoscience*, 3, 336-340, 10.1038/ngeo846, 2010.
- Amiro, B. D., Orchansky, A. L., Barr, A. G., Black, T. A., Chambers, S. D., Chapin Iii, F. S., Goulden, M. L., Litvak, M., Liu, H. P., McCaughey, J. H., McMillan, A., and Randerson, J. T.: The effect of post-fire stand age on the boreal forest energy balance, *Agricultural and Forest Meteorology*, 140, 41-50, 10.1016/j.agrformet.2006.02.014, 2006.
- Barichivich, J., Briffa, K. R., Myneni, R. B., Osborn, T. J., Melvin, T. M., Ciais, P., Piao, S., and Tucker, C.: Large-scale variations in the vegetation growing season and annual cycle of atmospheric CO<sub>2</sub> at high northern latitudes from 1950 to 2011, *Global change biology*, 19, 3167-3183, 10.1111/gcb.12283, 2013.
- Blagodatskaya, E., and Kuzyakov, Y.: Active microorganisms in soil: Critical review of estimation criteria and approaches, *Soil Biology and Biochemistry*, 67, 192-211, 10.1016/j.soilbio.2013.08.024, 2013.

461 Bond-Lamberty, B., Peckham, S. D., Ahl, D. E., and Gower, S. T.: Fire as the dominant driver of  
 462 central Canadian boreal forest carbon balance, *Nature*, 450, 89-92, 10.1038/nature06272, 2007.  
 463 Bond-Lamberty, B., and Thomson, A.: Temperature-associated increases in the global soil  
 464 respiration record, *Nature*, 464, 579-582, 10.1038/nature08930, 2010.  
 465 Callaghan, T., Björn, L. O., Chernov, Y., Chapin, T., Christensen, T. R., Huntley, B., Ims, R.,  
 466 Jolly, D., Jonasson, S., Matveyeva, N., Panikov, N., Oechel, W., and Shaver, G.: Arctic tundra  
 467 and polar desert ecosystems, *Arctic climate impact assessment*, 243-352, 2005.  
 468 Chapin, F. S., and Starfield, A. M.: Time lags and novel ecosystems in response to transient  
 469 climatic change in arctic Alaska, *Climatic change*, 35, 449-461, 1997.  
 470 Christensen, J. H., and Christensen, O. B.: A summary of the PRUDENCE model projections of  
 471 changes in European climate by the end of this century, *Climatic Change*, 81, 7-30,  
 472 10.1007/s10584-006-9210-7, 2007.  
 473 Ciais, P., Sabine, C., Bala, G., Bopp, L., Brovkin, V., Canadell, J., Chhabra, A., DeFries, R.,  
 474 Galloway, J., Heimann, M., Jones, C., Quéré, C. L., Myneni, R. B., Piao, S., and Thornton, P.:  
 475 Carbon and other biogeochemical cycles, *Climate change 2013: the physical science basis*.  
 476 Contribution of Working Group I to the Fifth Assessment Report of the Intergovernmental Panel  
 477 on Climate Change, 465-570, 2014.  
 478 Cole, C. V., Duxbury, J., Freney, J., Heinemeyer, O., K. Minami, Mosier, A., Paustian, K.,  
 479 Rosenberg, N., Sampson, N., Sauerbeck, D., and Zhao, Q.: Global estimates of potential  
 480 mitigation of greenhouse gas emissions by agriculture, *Nutrient cycling in Agroecosystems*, 49,  
 481 221-228, 1997.  
 482 Davidson, E. A., Trumbore, S. E., and Amundson, R.: Biogeochemistry: soil warming and  
 483 organic carbon content, *Nature*, 408, 2000.  
 484 Davidson, E. A., and Janssens, I. A.: Temperature sensitivity of soil carbon decomposition and  
 485 feedbacks to climate change, *Nature*, 440, 165-173, 10.1038/nature04514, 2006.  
 486 Dong, Y., and Somero, G. N.: Temperature adaptation of cytosolic malate dehydrogenases of  
 487 limpets (genus *Lottia*): differences in stability and function due to minor changes in sequence  
 488 correlate with biogeographic and vertical distributions, *The Journal of experimental biology*, 212,  
 489 169-177, 10.1242/jeb.024505, 2009.  
 490 Duan, Q., Sorooshian, S., and Gupta, V. K.: Optimal use of the SCE-UA global optimization  
 491 method for calibrating watershed models, *Journal of Hydrology*, 158, 265-284, 1994.  
 492 Esteban G. Jobbágy, and Jackson, R. B.: The vertical distribution of soil organic carbon and its  
 493 relation to climate and vegetation, *Ecological applications*, 10, 423-436, 2000.  
 494 Gear, A. J., and Huntley, B.: Rapid changes in the range limits of Scots pine 4000 years ago,  
 495 *Science*, 251, 544-547, 1991.  
 496 German, D. P., Marcelo, K. R. B., Stone, M. M., and Allison, S. D.: The Michaelis-Menten  
 497 kinetics of soil extracellular enzymes in response to temperature: a cross-latitudinal study,  
 498 *Global change biology*, 18, 1468-1479, 10.1111/j.1365-2486.2011.02615.x, 2012.  
 499 Goetz, S. J., Mack, M. C., Gurney, K. R., Randerson, J. T., and Houghton, R. A.: Ecosystem  
 500 responses to recent climate change and fire disturbance at northern high latitudes: observations  
 501 and model results contrasting northern Eurasia and North America, *Environmental Research*  
 502 *Letters*, 2, 045031, 10.1088/1748-9326/2/4/045031, 2007.

503 Hagerty, S. B., van Groenigen, K. J., Allison, S. D., Hungate, B. A., Schwartz, E., Koch, G. W.,  
 504 Kolka, R. K., and Dijkstra, P.: Accelerated microbial turnover but constant growth efficiency  
 505 with warming in soil, *Nature Climate Change*, 4, 903-906, 10.1038/nclimate2361, 2014.  
 506 Hansen, J., Sato, M., Ruedy, R., Lo, K., Lea, D. W., and Medina-Elizade, M.: Global  
 507 temperature change, *Proceedings of the National Academy of Sciences of the United States of*  
 508 *America*, 103, 14288-14293, 10.1073/pnas.0606291103, 2006.  
 509 Hanson, P. J., Edwards, N. T., Garten, C. T., and Andrews, J. A.: Separating root and soil  
 510 microbial contributions to soil respiration: A review of methods and observations,  
 511 *Biogeochemistry*, 48, 115-146, 2000.  
 512 Hao, G., Zhuang, Q., Zhu, Q., He, Y., Jin, Z., and Shen, W.: Quantifying microbial  
 513 ecophysiological effects on the carbon fluxes of forest ecosystems over the conterminous United  
 514 States, *Climatic Change*, 133, 695-708, 10.1007/s10584-015-1490-3, 2015.  
 515 Harden, J. W., Trumbore, S. E., Stocks, B. J., Hirsch, A., Gower, S. T., O'Neill, K. P., and  
 516 Kasischke, E. S.: The role of fire in the boreal carbon budget, *Global change biology*, 6, 174-184,  
 517 2000.  
 518 Harris, I., Jones, P. D., Osborn, T. J., and Lister, D. H.: Updated high-resolution grids of monthly  
 519 climatic observations - the CRU TS3.10 Dataset, *International Journal of Climatology*, 34, 623-  
 520 642, 10.1002/joc.3711, 2014.  
 521 Hayes, D. J., Kicklighter, D. W., McGuire, A. D., Chen, M., Zhuang, Q., Yuan, F., Melillo, J. M.,  
 522 and Wullschleger, S. D.: The impacts of recent permafrost thaw on land-atmosphere greenhouse  
 523 gas exchange, *Environmental Research Letters*, 9, 045005, 10.1088/1748-9326/9/4/045005, 2014.  
 524 He, Y., Yang, J., Zhuang, Q., Harden, J. W., McGuire, A. D., Liu, Y., Wang, G., and Gu, L.:  
 525 Incorporating microbial dormancy dynamics into soil decomposition models to improve  
 526 quantification of soil carbon dynamics of northern temperate forests, *Journal of Geophysical*  
 527 *Research: Biogeosciences*, 120, 2596-2611, 10.1002/2015jg003130, 2015.  
 528 Hobbie, E. A., and Hobbie, J. E.: Natural Abundance of  $^{15}\text{N}$  in Nitrogen-Limited Forests and  
 529 Tundra Can Estimate Nitrogen Cycling Through Mycorrhizal Fungi: A Review, *Ecosystems*, 11,  
 530 815-830, 10.1007/s10021-008-9159-7, 2008.  
 531 Hobbie, J. E., and Hobbie, E. A.:  $^{15}\text{N}$  in symbiotic fungi and plants estimates nitrogen and  
 532 carbon flux rates in Arctic tundra, *Ecology*, 87, 816-822, 2006.  
 533 Holland, M. M., and Bitz, C. M.: Polar amplification of climate change in coupled models,  
 534 *Climate Dynamics*, 21, 221-232, 10.1007/s00382-003-0332-6, 2003.  
 535 Houghton, R. A.: Balancing the Global Carbon Budget, *Annual Review of Earth and Planetary*  
 536 *Sciences*, 35, 313-347, 10.1146/annurev.earth.35.031306.140057, 2007.  
 537 Johnstone, J. F., and Kasischke, E. S.: Stand-level effects of soil burn severity on postfire  
 538 regeneration in a recently burned black spruce forest, *Canadian Journal of Forest Research*, 35,  
 539 2151-2163, 10.1139/x05-087, 2005.  
 540 Kasischke, E. S., and Turetsky, M. R.: Recent changes in the fire regime across the North  
 541 American boreal region—Spatial and temporal patterns of burning across Canada and Alaska,  
 542 *Geophysical Research Letters*, 33, 10.1029/2006gl025677, 2006.  
 543 Knorr, W.: Annual and interannual  $\text{CO}_2$  exchanges of the terrestrial biosphere: process-based  
 544 simulations and uncertainties, *Global Ecology and Biogeography*, 9, 225-252, 2000.  
 545 Lawrence, D. M., Oleson, K. W., Flanner, M. G., Thornton, P. E., Swenson, S. C., Lawrence, P.  
 546 J., Zeng, X., Yang, Z.-L., Levis, S., Sakaguchi, K., Bonan, G. B., and Slater, A. G.:

547 Parameterization improvements and functional and structural advances in Version 4 of the  
 548 Community Land Model, *Journal of Advances in Modeling Earth Systems*, 3,  
 549 10.1029/2011ms000045, 2011.  
 550 Lennon, J. T., and Jones, S. E.: Microbial seed banks: the ecological and evolutionary  
 551 implications of dormancy, *Nature reviews. Microbiology*, 9, 119-130, 10.1038/nrmicro2504,  
 552 2011.  
 553 Lloyd, A. H.: Ecological histories from Alaskan tree lines provide insight into future change,  
 554 *Ecology*, 86, 1687-1695, 2005.  
 555 Mack, M. C., Schuur, E. A. G., Bret-Harte, M. S., Shaver, G. R., and III, F. S. C.: Ecosystem  
 556 carbon storage in arctic tundra reduced by long-term nutrient fertilization, *Nature*, 431, 2004.  
 557 McGuire, A. D., Melillo, J. M., Joyce, L. A., Kicklighter, D. W., Grace, A. L., III, B. M., and  
 558 Vorosmarty, C. J.: Interactions between carbon and nitrogen dynamics in estimating net primary  
 559 productivity for potential vegetation in North America, *Global Biogeochemical Cycles*, 6, 101-  
 560 124, 1992.  
 561 McGuire, A. D., Melillo, J. M., Kicklighter, D. W., and Joyce, L. A.: Equilibrium responses of  
 562 soil carbon to climate change: Empirical and process-based estimates, *Journal of Biogeography*,  
 563 785-796, 1995.  
 564 McGuire, A. D., and Hobbie, J. E.: Global climate change and the equilibrium responses of  
 565 carbon storage in arctic and subarctic regions, In *Modeling the Arctic system: A workshop report*  
 566 *on the state of modeling in the Arctic System Science program*, 53-54, 1997.  
 567 McGuire, A. D., Anderson, L. G., Christensen, T. R., Dallimore, S., Guo, L., Hayes, D. J.,  
 568 Heimann, M., Lorenson, T. D., Macdonald, R. W., and Roulet, N.: Sensitivity of the carbon  
 569 cycle in the Arctic to climate change, *Ecological Monographs*, 79, 523-555, 2009.  
 570 McGuire, A. D., Christensen, T. R., Hayes, D., Herault, A., Euskirchen, E., Kimball, J. S.,  
 571 Koven, C., Lafleur, P., Miller, P. A., Oechel, W., Peylin, P., Williams, M., and Yi, Y.: An  
 572 assessment of the carbon balance of Arctic tundra: comparisons among observations, process  
 573 models, and atmospheric inversions, *Biogeosciences*, 9, 3185-3204, 10.5194/bg-9-3185-2012,  
 574 2012.  
 575 Melillo, J. M., McGuire, A. D., Kicklighter, D. W., III, B. M., Vorosmarty, C. J., and Schloss, A.  
 576 L.: Global climate change and terrestrial net primary production, *Nature*, 363, 1993.  
 577 Oechel, W. C., Vourlitis, G. L., Hastings, S. J., Zulueta, R. C., Hinzman, L., and Kane, D.:  
 578 Acclimation of ecosystem CO<sub>2</sub> exchange in the Alaskan Arctic in response to decadal climate  
 579 warming, *Nature*, 406, 978, 2000.  
 580 Orchard, V. A., and Cook, F. J.: Relationship between soil respiration and soil moisture, 15, 447-  
 581 453, 1983.  
 582 Parton, W. J., Ojima, D. S., Cole, C. V., and Schimel, D. S.: A general model for soil organic  
 583 matter dynamics: sensitivity to litter chemistry, texture and management, *Quantitative modeling*  
 584 *of soil forming processes*, 147-167, 1994.  
 585 Potter, C. S., Randerson, J. T., Field, C. B., Matson, P. A., Vitousek, P. M., Mooney, H. A., and  
 586 Klooster, S. A.: Terrestrial ecosystem production: a process model based on global satellite and  
 587 surface data, *Global Biogeochemical Cycles*, 7, 811-841, 1993.  
 588 Qian, H., Joseph, R., and Zeng, N.: Enhanced terrestrial carbon uptake in the Northern High  
 589 Latitudes in the 21st century from the Coupled Carbon Cycle Climate Model Intercomparison



590 Project model projections, *Global change biology*, 16, 641-656, 10.1111/j.1365-  
 591 2486.2009.01989.x, 2010.  
 592 Raich, J. W., and Schlesinger, W. H.: The global carbon dioxide flux in soil respiration and its  
 593 relationship to vegetation and climate, *Tellus B*, 44, 81-99, 1992.  
 594 Randerson, J. T., Liu, H., Flanner, M. G., Chambers, S. D., Jin, Y., Hess, P. G., Pfister, G., Mack,  
 595 M. C., Treseder, K. K., Welp, L. R., Chapin, F. S., Harden, J. W., Goulden, M. L., Lyons, E.,  
 596 Neff, J. C., Schuur, E. A. G., and Zender, C. S.: The impact of boreal forest fire on climate  
 597 warming, *science*, 1130-1132, 2006.  
 598 Running, S. W., and Coughlan, J. C.: A general model of forest ecosystem processes for regional  
 599 applications I. Hydrologic balance, canopy gas exchange and primary production processes.,  
 600 *Ecological Modelling*, 42, 125-154, 1988.  
 601 Schaphoff, S., Heyder, U., Ostberg, S., Gerten, D., Heinke, J., and Lucht, W.: Contribution of  
 602 permafrost soils to the global carbon budget, *Environmental Research Letters*, 8, 014026,  
 603 10.1088/1748-9326/8/1/014026, 2013.  
 604 Schimel, J.: The implications of exoenzyme activity on microbial carbon and nitrogen limitation  
 605 in soil: a theoretical model, *Soil Biology and Biochemistry*, 35, 549-563, 10.1016/s0038-  
 606 0717(03)00015-4, 2003.  
 607 Schimel, J.: Microbes and global carbon, *Nature Climate Change*, 3, 867-868,  
 608 10.1038/nclimate2015, 2013.  
 609 Schimel, J. P., and Hättenschwiler, S.: Nitrogen transfer between decomposing leaves of  
 610 different N status, *Soil Biology and Biochemistry*, 39, 1428-1436, 10.1016/j.soilbio.2006.12.037,  
 611 2007.  
 612 Schimel, J. P., and Schaeffer, S. M.: Microbial control over carbon cycling in soil, *Frontiers in*  
 613 *microbiology*, 3, 348, 10.3389/fmicb.2012.00348, 2012.  
 614 Schmidt, M. W., Torn, M. S., Abiven, S., Dittmar, T., Guggenberger, G., Janssens, I. A., Kleber,  
 615 M., Kogel-Knabner, I., Lehmann, J., Manning, D. A., Nannipieri, P., Rasse, D. P., Weiner, S.,  
 616 and Trumbore, S. E.: Persistence of soil organic matter as an ecosystem property, *Nature*, 478,  
 617 49-56, 10.1038/nature10386, 2011.  
 618 Schuur, E. A. G., Bockheim, J., Canadell, J. G., Euskirchen, E., Field, C. B., Goryachkin, S. V.,  
 619 Hagemann, S., Kuhry, P., Lafleur, P. M., Lee, H., and Mazhitova, G.: Vulnerability of  
 620 permafrost carbon to climate change: Implications for the global carbon cycle, *BioScience*, 58,  
 621 701-714, 2008.  
 622 Serreze, M. C., and Francis, J. A.: The Arctic on the fast track of change, *Weather*, 61, 65-69,  
 623 2006.  
 624 Soja, A. J., Tchebakova, N. M., French, N. H. F., Flannigan, M. D., Shugart, H. H., Stocks, B. J.,  
 625 Sukhinin, A. I., Parfenova, E. I., Chapin, F. S., and Stackhouse, P. W.: Climate-induced boreal  
 626 forest change: Predictions versus current observations, *Global and Planetary Change*, 56, 274-  
 627 296, 10.1016/j.gloplacha.2006.07.028, 2007.  
 628 Somero, G. N.: Adaptation of enzymes to temperature: searching for basic "strategies",  
 629 *Comparative biochemistry and physiology. Part B, Biochemistry & molecular biology*, 139, 321-  
 630 333, 10.1016/j.cbpc.2004.05.003, 2004.  
 631 Steinweg, J. M., Plante, A. F., Conant, R. T., Paul, E. A., and Tanaka, D. L.: Patterns of substrate  
 632 utilization during long-term incubations at different temperatures, *Soil Biology and Biochemistry*,  
 633 40, 2722-2728, 10.1016/j.soilbio.2008.07.002, 2008.

634 Steinweg, J. M., Dukes, J. S., Paul, E. A., and Wallenstein, M. D.: Microbial responses to multi-  
 635 factor climate change: effects on soil enzymes, *Frontiers in microbiology*, 4, 146,  
 636 10.3389/fmicb.2013.00146, 2013.  
 637 Stone, M. M., Weiss, M. S., Goodale, C. L., Adams, M. B., Fernandez, I. J., German, D. P., and  
 638 Allison, S. D.: Temperature sensitivity of soil enzyme kinetics under N-fertilization in two  
 639 temperate forests, *Global change biology*, 18, 1173-1184, 10.1111/j.1365-2486.2011.02545.x,  
 640 2012.  
 641 Stow, D. A., Hope, A., McGuire, D., Verbyla, D., Gamon, J., Huemmrich, F., Houston, S.,  
 642 Racine, C., Sturm, M., Tape, K., Hinzman, L., Yoshikawa, K., Tweedie, C., Noyle, B.,  
 643 Silapaswan, C., Douglas, D., Griffith, B., Jia, G., Epstein, H., Walker, D., Daeschner, S.,  
 644 Petersen, A., Zhou, L., and Myneni, R.: Remote sensing of vegetation and land-cover change in  
 645 Arctic Tundra Ecosystems, *Remote Sensing of Environment*, 89, 281-308,  
 646 10.1016/j.rse.2003.10.018, 2004.  
 647 Sturm, M., Racine, C., and Tape, K.: Climate change: increasing shrub abundance in the Arctic.,  
 648 *Nature*, 411, 2001.  
 649 Tang, J., and Zhuang, Q.: Equifinality in parameterization of process-based biogeochemistry  
 650 models: A significant uncertainty source to the estimation of regional carbon dynamics, *Journal*  
 651 *of Geophysical Research: Biogeosciences*, 113, 10.1029/2008jg000757, 2008.  
 652 Tape, K. E. N., Sturm, M., and Racine, C.: The evidence for shrub expansion in Northern Alaska  
 653 and the Pan-Arctic, *Global change biology*, 12, 686-702, 10.1111/j.1365-2486.2006.01128.x,  
 654 2006.  
 655 Tarnocai, C., Canadell, J. G., Schuur, E. A. G., Kuhry, P., Mazhitova, G., and Zimov, S.: Soil  
 656 organic carbon pools in the northern circumpolar permafrost region, *Global Biogeochemical*  
 657 *Cycles*, 23, n/a-n/a, 10.1029/2008gb003327, 2009.  
 658 Todd-Brown, K. E. O., Hopkins, F. M., Kivlin, S. N., Talbot, J. M., and Allison, S. D.: A  
 659 framework for representing microbial decomposition in coupled climate models,  
 660 *Biogeochemistry*, 109, 19-33, 10.1007/s10533-011-9635-6, 2011.  
 661 Todd-Brown, K. E. O., Randerson, J. T., Post, W. M., Hoffman, F. M., Tarnocai, C., Schuur, E.  
 662 A. G., and Allison, S. D.: Causes of variation in soil carbon simulations from CMIP5 Earth  
 663 system models and comparison with observations, *Biogeosciences*, 10, 1717-1736, 10.5194/bg-  
 664 10-1717-2013, 2013.  
 665 White, A., Cannell, M. G. R., and Friend, A. D.: The high-latitude terrestrial carbon sink: a  
 666 model analysis *Global change biology*, 6, 227-245, 2000.  
 667 Wieder, W. R., Bonan, G. B., and Allison, S. D.: Global soil carbon projections are improved by  
 668 modelling microbial processes, *Nature Climate Change*, 3, 909-912, 10.1038/nclimate1951, 2013.  
 669 Zhuang, Q., Romanovsky, V. E., and McGuire, A. D.: Incorporation of a permafrost model into a  
 670 large-scale ecosystem model: Evaluation of temporal and spatial scaling issues in simulating soil  
 671 thermal dynamics, *Journal of Geophysical Research: Atmospheres*, 106, 33649-33670,  
 672 10.1029/2001jd900151, 2001.  
 673 Zhuang, Q., McGuire, A. D., O'Neill, K. P., Harden, J. W., Romanovsky, V. E., and Yarie, J.:  
 674 Modeling soil thermal and carbon dynamics of a fire chronosequence in interior Alaska, *Journal*  
 675 *of Geophysical Research*, 108, 10.1029/2001jd001244, 2002.  
 676 Zhuang, Q., He, J., Lu, Y., Ji, L., Xiao, J., and Luo, T.: Carbon dynamics of terrestrial  
 677 ecosystems on the Tibetan Plateau during the 20th century: an analysis with a process-based

biogeochemical model, *Global Ecology and Biogeography*, no-no, 10.1111/j.1466-8238.2010.00559.x, 2010.

Zhuang, Q., Chen, M., Xu, K., Tang, J., Saikawa, E., Lu, Y., Melillo, J. M., Prinn, R. G., and McGuire, A. D.: Response of global soil consumption of atmospheric methane to changes in atmospheric climate and nitrogen deposition, *Global Biogeochemical Cycles*, 27, 650-663, 10.1002/gbc.20057, 2013.

Zhuang, Q., Zhu, X., He, Y., Prigent, C., Melillo, J. M., David McGuire, A., Prinn, R. G., and Kicklighter, D. W.: Influence of changes in wetland inundation extent on net fluxes of carbon dioxide and methane in northern high latitudes from 1993 to 2004, *Environmental Research Letters*, 10, 095009, 10.1088/1748-9326/10/9/095009, 2015.

Zhuang, Q., McGuire, A. D., Melillo, J. M., Clein, J. S., Dargaville, R. J., Kicklighter, D. W., Myneni, R. B., Dong, J., Romanovsky, V. E., Harden, J., and Hobbie, J. E.: Carbon cycling in extratropical terrestrial ecosystems of the Northern Hemisphere during the 20th century: a modeling analysis of the influences of soil thermal dynamics, *Tellus B: Chemical and Physical Meteorology*, 55, 751-776, 10.3402/tellusb.v55i3.16368, 2003.

Zimov, S. A., Schuur, E. A. G., and III, F. S. C.: Permafrost and the global carbon budget, *Science*, 312, 1612-1613, 2006.

**Author contributions.** Q.Z. designed the study. J.Z. conducted model development, simulation and analysis. J.Z. and Q. Z. wrote the paper.

**Competing financial interests.** The submission has no competing financial interests.

**Materials & Correspondence.** Correspondence and material requests should be addressed to [gqzhuang@purdue.edu](mailto:gqzhuang@purdue.edu).

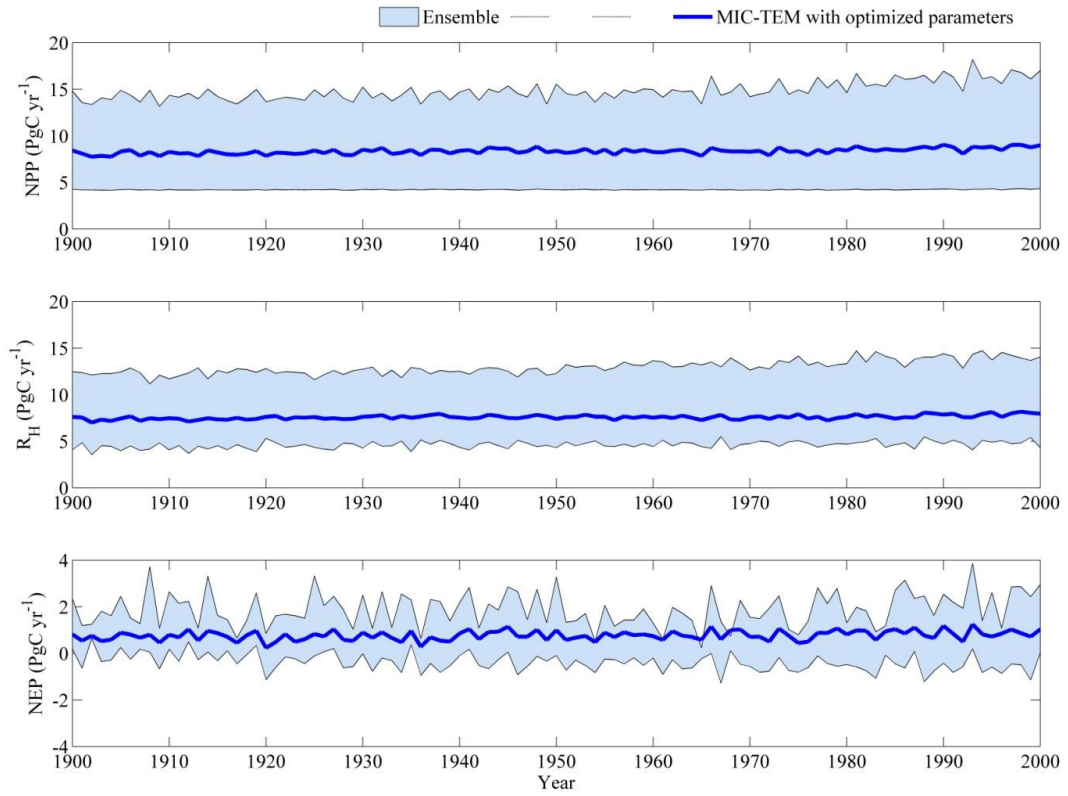

Figure 1. Simulated annual net primary production (NPP, top panel), heterotrophic respiration ( $R_H$ , center panel) and net ecosystem production (NEP, bottom panel) by MIC-TEM with ensemble of parameters.

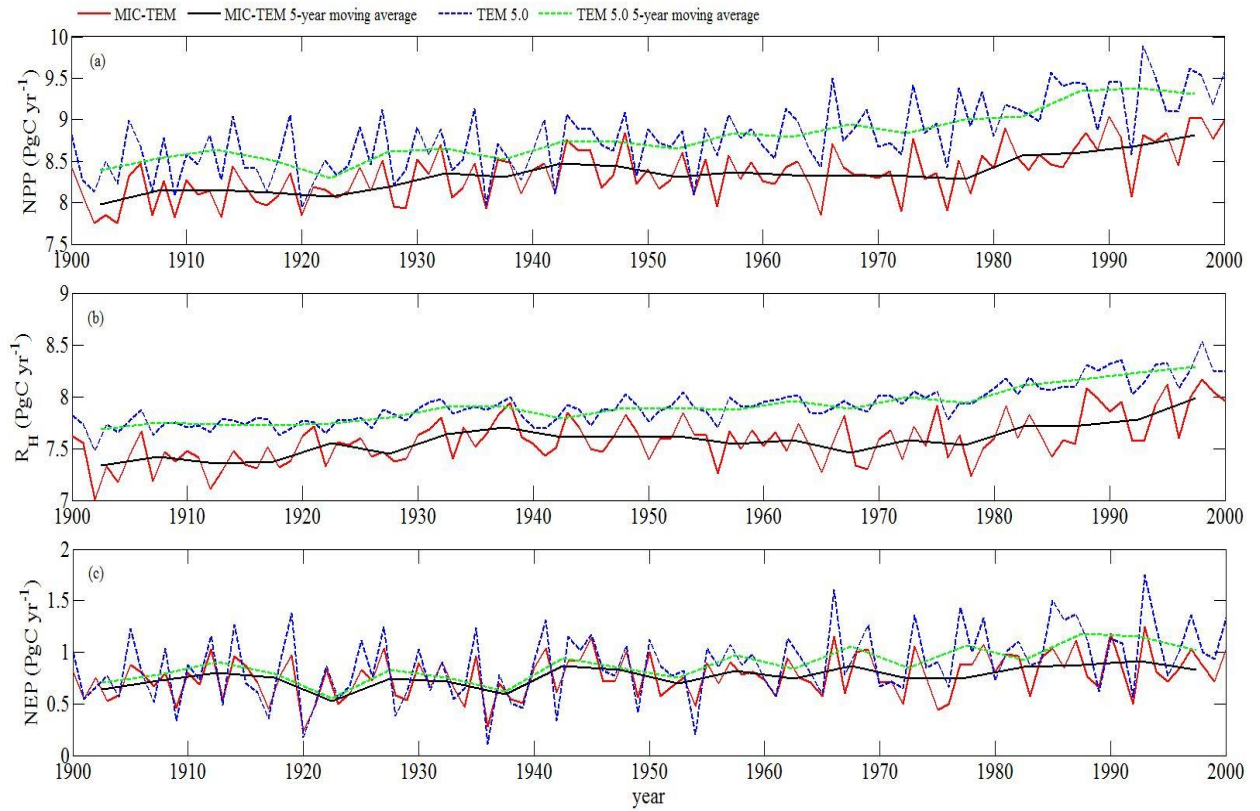

Figure 2. Simulated annual net primary production (NPP, top panel), heterotrophic respiration ( $R_H$ , center panel) and net ecosystem production (NEP, bottom panel) by MIC-TEM and TEM, respectively.

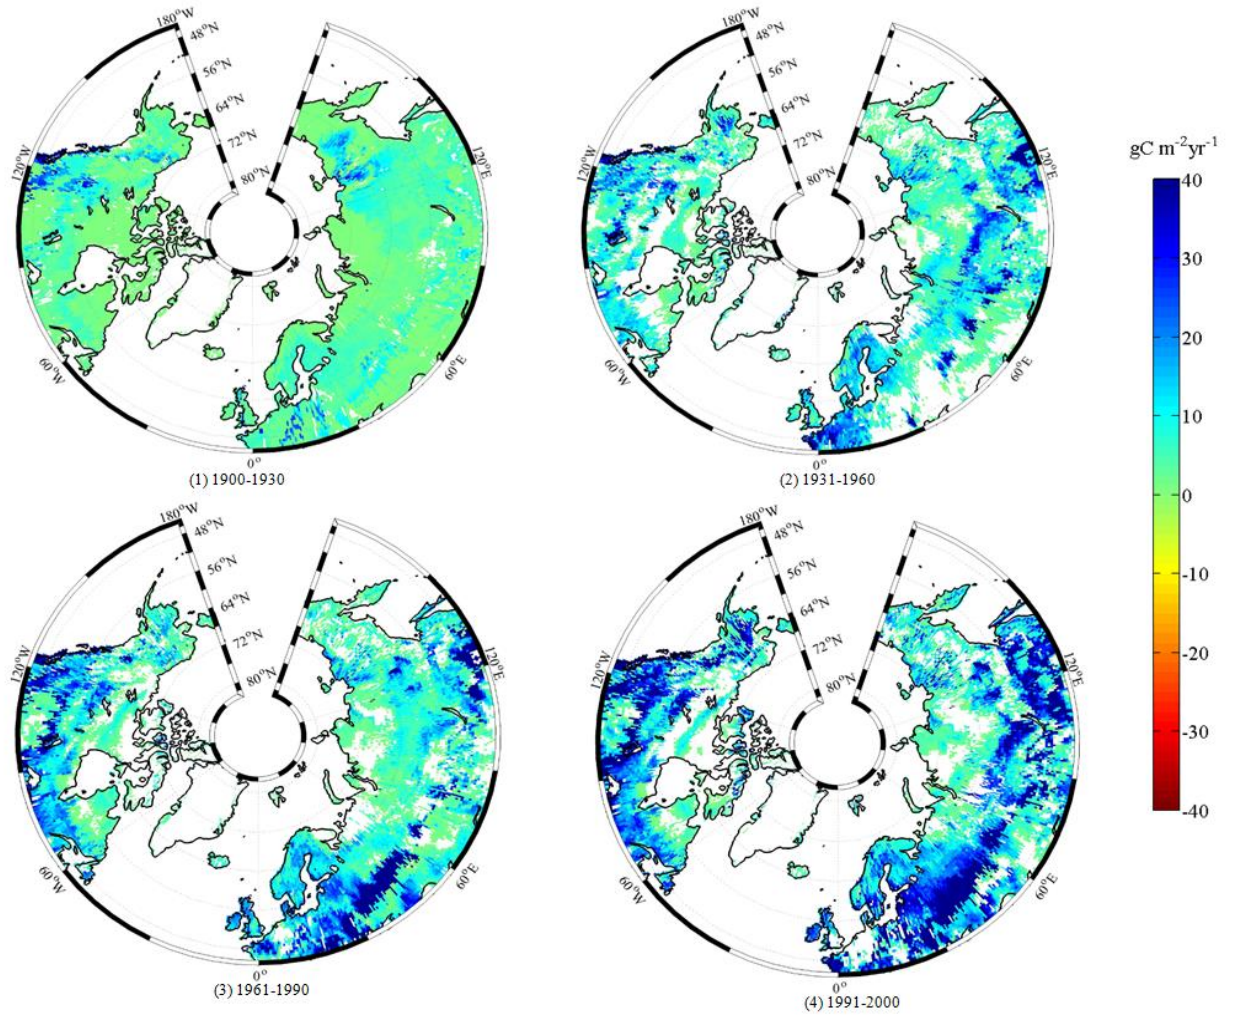

Figure 3. Spatial distribution of NEP simulated by MIC-TEM for the periods: (1) 1900-1930, (2) 1931-1960, (3) 1961-1990, and (4) 1991-2000. Positive values of NEP represent sinks of CO<sub>2</sub> into terrestrial ecosystems, while negative values represent sources of CO<sub>2</sub> to the atmosphere.



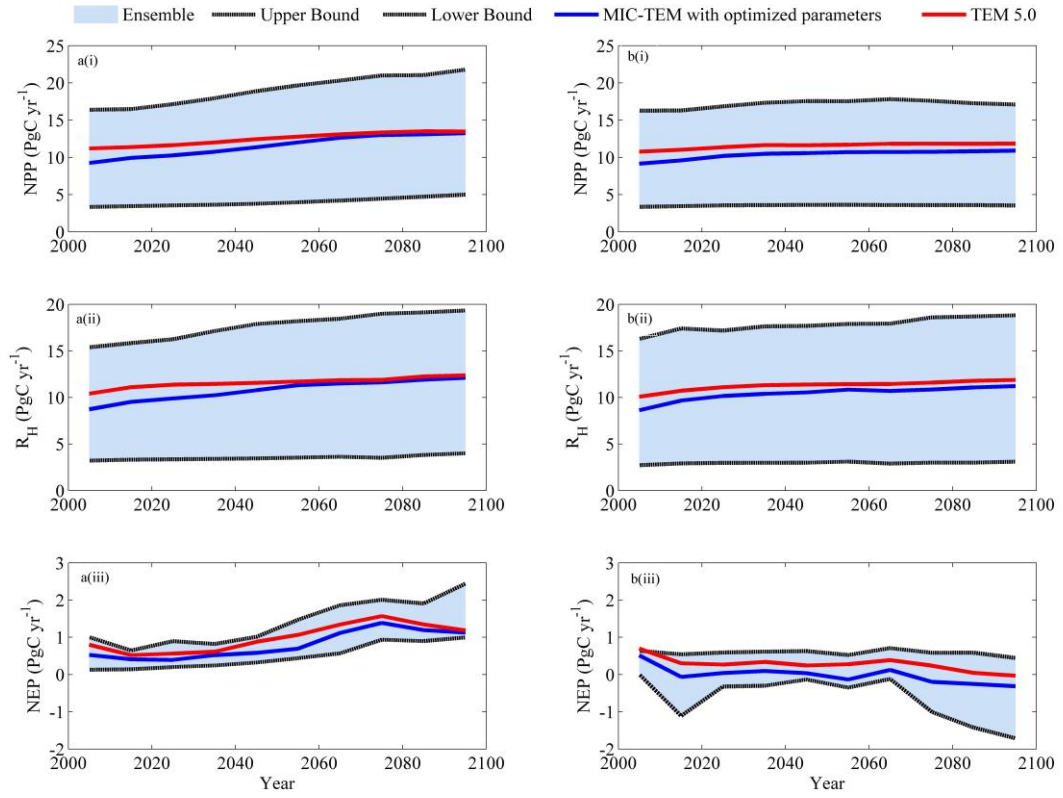

Figure 4. Predicted changes in carbon fluxes: (i) NPP, (ii)  $R_H$ , and (iii) NEP for all land areas north of  $45^\circ\text{N}$  in response to transient climate change under (a) RCP 8.5 scenario and (b) RCP 2.6 scenario with MIC-TEM and TEM 5.0, respectively. The decadal running mean is applied. The grey area represents the upper and lower bounds of simulations.

**Table 1. Parameters associated with more detailed microbial dynamics in MIC-TEM**

| Process                    | Parameter             | Units                                                                                | Initial Value | Description                                                                   | Parameter range | Reference             |
|----------------------------|-----------------------|--------------------------------------------------------------------------------------|---------------|-------------------------------------------------------------------------------|-----------------|-----------------------|
| Assimilation               | $Vmax_{uptake_0}$     | mg DOC cm <sup>-3</sup> (mg biomass cm <sup>-3</sup> ) <sup>-1</sup> h <sup>-1</sup> | 9.97e6        | Maximum microbial uptake rate                                                 | [1.0e4, 1.0e8]  | Hao et al. (2015)     |
|                            | $Ea_{uptake}$         | kJ mol <sup>-1</sup>                                                                 | 47            | Activation energy                                                             | -               | Allison et al. (2010) |
|                            | $Km_{uptake_{slope}}$ | mg cm <sup>-3</sup> degree <sup>-1</sup>                                             | 0.01          | Temperature regulator of MM for DOC uptake by microbes                        | -               | Allison et al. (2010) |
| CO <sub>2</sub> production | $Km_{uptake_0}$       | mg cm <sup>-3</sup>                                                                  | 0.1           | Temperature regulator of MM for DOC uptake by microbes                        | -               | Allison et al. (2010) |
|                            | $CUE_{slope}$         | degree <sup>-1</sup>                                                                 | -0.016        | Temperature regulator of carbon use efficiency                                | -               | Allison et al. (2010) |
|                            | $CUE_0$               | -                                                                                    | 0.63          | Temperature regulator of carbon use efficiency                                | -               | Allison et al. (2010) |
| Decay                      | $Vmax_0$              | mg SOC cm <sup>-3</sup> (mg Enz cm <sup>-3</sup> ) <sup>-1</sup> h <sup>-1</sup>     | 9.17e7        | Maximum rate of converting SOC to soluble C                                   | [1.0e5, 1.0e8]  | Hao et al. (2015)     |
|                            | $Ea$                  | kJ mol <sup>-1</sup>                                                                 | 47            | Activation energy                                                             | -               | Allison et al. (2010) |
|                            | $Km_{slope}$          | mg cm <sup>-3</sup> degree <sup>-1</sup>                                             | 5             | Temperature regulator of MM for enzymatic decay                               | -               | Allison et al. (2010) |
| MIC turnover               | $Km_0$                | mg cm <sup>-3</sup>                                                                  | 500           | Temperature regulator of MM for enzymatic decay                               | -               | Allison et al. (2010) |
|                            | $r_{death}$           | <u>s<sup>-1</sup></u>                                                                | 0.02          | Microbial death fraction                                                      | -               | Allison et al. (2010) |
|                            | MICtoSOC              |                                                                                      | 50            | Partition coefficient for dead microbial biomass between the SOC and DOC pool | -               | Allison et al. (2010) |
| ENZ turnover               | $r_{EnzProd}$         | <u>s<sup>-1</sup></u> -                                                              | 5.0e-4        | Enzyme production fraction                                                    | -               | Allison et al. (2010) |
|                            | $r_{EnzLoss}$         | <u>s<sup>-1</sup></u> -                                                              | 0.1           | Enzyme loss fraction                                                          | -               | Allison et al. (2010) |



**Table 2. Partitioning of average annual net ecosystem production (as Pg C per year) for six vegetation types during the 20<sup>th</sup> century**

|                  | MIC-TEM (PgC yr <sup>-1</sup> ) | TEM 5.0 (PgC y <sup>-1</sup> ) |
|------------------|---------------------------------|--------------------------------|
| Alpine tundra    | 0.03                            | 0.04                           |
| Boreal forest    | 0.39                            | 0.45                           |
| Conifer forest   | 0.09                            | 0.09                           |
| Deciduous forest | 0.16                            | 0.18                           |
| Grassland        | 0.06                            | 0.07                           |
| Wet tundra       | 0.05                            | 0.06                           |
| Total            | 0.78                            | 0.89                           |

**Table 3. Increasing of SOC, vegetation carbon (VGC), soil organic nitrogen (SON), vegetation nitrogen (VGN) from 1900 to 2000, and total carbon storage during the 21<sup>st</sup> century predicted by two models with observed soil carbon data of three different depths under (a) RCP 2.6 and (b) RCP 8.5.**

(a)

| Model   | Units: Pg                                                            | Without (control) | 30cm       | 100cm      | 300cm       |
|---------|----------------------------------------------------------------------|-------------------|------------|------------|-------------|
| TEM 5.0 | SOC/SON in 2000                                                      | 604.2/27.0        | 429.5/19.0 | 689.3/31.6 | 1003.4/46.2 |
|         | Increase of SOC during the 21 <sup>st</sup> century                  | 12.1              | 9.9        | 16.0       | 22.8        |
|         | VGC/VGN in 2000                                                      | 318.3/1.48        | 238.4/1.05 | 394.2/1.80 | 556.7/2.53  |
|         | Increase of VGC during the 21 <sup>st</sup> century                  | 15.5              | 10.5       | 18.0       | 25.3        |
|         | Increase of total carbon storage during the 21 <sup>st</sup> century | 27.6              | 20.4       | 34.0       | 48.1        |
| MIC-TEM | SOC/SON in 2000                                                      | 591.5/26.8        | 420.3/18.6 | 686.0/31.2 | 990.7/45.3  |
|         | Increase of SOC during the 21 <sup>st</sup> century                  | -2.0              | -1.2       | -2.4       | -2.9        |
|         | VGC/VGN in 2000                                                      | 309.7/1.42        | 230.1/1.02 | 374.4/1.71 | 548.6/2.45  |
|         | Increase of VGC during the 21 <sup>st</sup> century                  | 0.4               | 0.5        | 0.2        | -0.1        |
|         | Increase of total carbon storage during the 21 <sup>st</sup> century | -1.6              | -0.7       | -2.2       | -3.0        |

(b)

| Model   | Units: Pg                                                            | Without (control) | 30cm       | 100cm      | 300cm       |
|---------|----------------------------------------------------------------------|-------------------|------------|------------|-------------|
| TEM 5.0 | SOC/SON in 2000                                                      | 610.2 /27.9       | 431.9/19.1 | 693.8/31.8 | 1007.1/46.4 |
|         | Increase of SOC during the 21 <sup>st</sup> century                  | 44.2              | 33.0       | 56.5       | 74.6        |
|         | VGC/VGN in 2000                                                      | 324.9/1.50        | 242.1/1.07 | 399.6/1.83 | 570.2/2.57  |
|         | Increase of VGC during the 21 <sup>st</sup> century                  | 54.5              | 38.7       | 63.5       | 81.0        |
|         | Increase of total carbon storage during the 21 <sup>st</sup> century | 98.7              | 71.7       | 120.0      | 155.6       |
| MIC-TEM | SOC/SON in 2000                                                      | 596.0/27.1        | 424.6/18.8 | 689.1/31.5 | 995.5/46.1  |
|         | Increase of SOC during the 21 <sup>st</sup> century                  | 33.3              | 27.4       | 36.9       | 42.9        |
|         | VGC/VGN in 2000                                                      | 316.0/1.44        | 233.5/1.02 | 380.0/1.72 | 568.3/2.56  |
|         | Increase of VGC during the 21 <sup>st</sup> century                  | 46.2              | 37.0       | 51.7       | 56.9        |
|         | Increase of total carbon storage during the 21 <sup>st</sup> century | 79.5              | 65.4       | 88.6       | 109.8       |
